# Supplementary material for: Anti-Inflammatory Effects of Chamaecyparis obtusa (Siebold & Zucc.) Endl. Leaf Extract Fermented by Ganoderma applanatum Mycelia
Source: MDPI journal article supplement (doi:10.3390/pharmaceutics16030365), 2024-03-05
Supplement: s1 [file s1]

**Anti-Inflammatory Effects of *Chamaecyparis obtusa* (Siebold & Zucc.) Endl. Leaf  
Extract Fermented by *Ganoderma applanatum* Mycelia**

Table S1. Used reagents in this study

| Reagents                                                                      | Catalog number | Company                                               |
|-------------------------------------------------------------------------------|----------------|-------------------------------------------------------|
| 2,2-Diphenyl-1-picrylhydrazyl (DPPH)                                          | D9132          | Sigma Aldrich (St. Louis, MO, USA)                    |
| 2,2'-Azino-bis(3-ethylbenzothiazoline-6-sulfonic acid) diammonium salt (ABTS) | 11557          |                                                       |
| Potassium persulfate                                                          | 216224         |                                                       |
| L-Ascorbic acid                                                               | A0278          |                                                       |
| Tannic acid                                                                   | 403040         |                                                       |
| Lipopolysaccharide (LPS)                                                      | L3012          |                                                       |
| Griess reagent                                                                | G4410          |                                                       |
| Phenol reagent (Folin-Ciocalteu's reagent)                                    | 96703S8130     | JUNSEI CHEMICAL CO., LTD (Tokyo, Japan)               |
| Sodium carbonate anhydrous                                                    | 7541-4405      | DAEJUNG CHEMICALS & METALS (Seoul, Republic of Korea) |
| 3-(4,5-dimethylthiazol-2-yl)-2,5-diphenyltetrazolium bromide (MTT)            | M1415          | Duchefa Biochemie (Haarlem, Netherlands)              |

Table S2. Used antibodies in this study

| Antibody                  | Catalog number | Company                                           |
|---------------------------|----------------|---------------------------------------------------|
| COX-2                     | #12282         | Cell Signaling Technology<br>(Danvers, MA, USA)   |
| pT/Y-p44/42 MAPK (Erk1/2) | #9101          |                                                   |
| p44/42 MAPK (Erk1/2)      | #4695          |                                                   |
| pT/Y-SAPK/JNK             | #9251          |                                                   |
| SAPK/JNK                  | #9252          |                                                   |
| pT/Y-p38 MAPK             | #9211          |                                                   |
| p38 MAPK                  | #9212          |                                                   |
| pS-I $\kappa$ B $\alpha$  | #2859          |                                                   |
| pS-NF $\kappa$ B          | #3033          |                                                   |
| pY-STAT1                  | #8826          |                                                   |
| STAT1                     | #9172          |                                                   |
| pY-STAT3                  | #9145          |                                                   |
| STAT3                     | #30835         |                                                   |
| I $\kappa$ B $\alpha$     | sc-1643        | Santa Cruz Biotechnology<br>(Santa Cruz, CA, USA) |
| NF $\kappa$ B             | sc-8008        |                                                   |
| $\beta$ -Actin            | sc-47778       |                                                   |
| iNOS                      | PA-1036        | Invitrogen<br>(Waltham, MA, USA)                  |
| HRP-tagged anti-rabbit    | A21010         | Abbkine (Wuhan, China)                            |
| HRP-tagged anti-mouse     | ADI-SAB-100    | Enzo Life Science<br>(Farmingdale, NY, USA)       |

Table S3. Summary of HPLC analysis conditions

|                |                                              |        |       |
|----------------|----------------------------------------------|--------|-------|
| Instrument     | Agilent HPLC 1260                            |        |       |
| Parameter      | Condition                                    |        |       |
| Column         | Agilent Eclipse XDB-C18 (5 μm, 4.6 × 250 mm) |        |       |
| Column temp.   | 30 °C                                        |        |       |
| Injection vol. | 15 μl                                        |        |       |
| Flow rate      | 1 ml/min                                     |        |       |
| Wavelength     | Amentoflavone                                | 330 nm |       |
|                | Quercitrin, Myricetin                        | 376 nm |       |
| Mobile phase A | DIW                                          |        |       |
| Mobile phase B | ACN                                          |        |       |
| Gradient       | Time (min)                                   | A (%)  | B (%) |
|                | initial                                      | 80     | 20    |
|                | 5.0                                          | 65     | 35    |
|                | 8.0                                          | 65     | 35    |
|                | 23.0                                         | 50     | 50    |
|                | 23.1                                         | 0      | 100   |
|                | 28.0                                         | 0      | 100   |
|                | 28.1                                         | 80     | 20    |
|                | 33.0                                         | 80     | 20    |

Table S4. Peak table of HPLC chromatogram of 70COL. (a) Quercitrin. (b) Amentoflavone.

(a) 70COL – Wavelength 330 nm

| #  | Time   | Area     | Height   | Width  | Area%  | Symmetry | Name       |
|----|--------|----------|----------|--------|--------|----------|------------|
| 1  | 1.038  | 3.70E-01 | 1.00E-01 | 0.0534 | 0.026  | 1.25     |            |
| 2  | 2.064  | 56.1     | 10.3     | 0.0796 | 3.893  | 1.048    |            |
| 3  | 2.22   | 64.2     | 13       | 0.0696 | 4.456  | 2.095    |            |
| 4  | 2.299  | 74       | 15.2     | 0.0768 | 5.133  | 0.994    |            |
| 5  | 2.476  | 3.8      | 5.70E-01 | 0.0932 | 0.263  | 0.329    |            |
| 6  | 2.891  | 42.3     | 12.4     | 0.0518 | 2.94   | 0.789    |            |
| 7  | 3.031  | 85.9     | 16.9     | 0.0793 | 5.962  | 0.934    |            |
| 8  | 3.227  | 34.1     | 3.7      | 0.1378 | 2.367  | 0.915    |            |
| 9  | 3.559  | 1.1      | 2.00E-01 | 0.089  | 0.076  | 0.988    |            |
| 10 | 3.769  | 7.1      | 9.20E-01 | 0.1207 | 0.496  | 0.686    |            |
| 11 | 4.188  | 23       | 3.2      | 0.1053 | 1.595  | 0.791    |            |
| 12 | 4.527  | 8.4      | 9.30E-01 | 0.1274 | 0.58   | 1.151    |            |
| 13 | 4.89   | 132.8    | 17.8     | 0.111  | 9.219  | 0.78     |            |
| 14 | 5.205  | 1.4      | 3.10E-01 | 0.068  | 0.097  | 1.176    |            |
| 15 | 5.334  | 1.20E-01 | 4.20E-02 | 0.0483 | 0.008  | 1.643    |            |
| 16 | 5.504  | 5.7      | 6.60E-01 | 0.1415 | 0.396  | 0.976    |            |
| 17 | 5.758  | 5.2      | 8.40E-01 | 0.1    | 0.36   | 2.757    |            |
| 18 | 5.884  | 22.6     | 3.6      | 0.0949 | 1.571  | 1.027    |            |
| 19 | 6.089  | 5.5      | 1        | 0.0854 | 0.383  | 0.674    |            |
| 20 | 6.371  | 217.3    | 28.9     | 0.1096 | 15.081 | 0.584    | Quercitrin |
| 21 | 6.659  | 24.7     | 3.3      | 0.1101 | 1.717  | 0.984    |            |
| 22 | 6.876  | 7        | 1.5      | 0.0708 | 0.484  | 1.084    |            |
| 23 | 7.004  | 27.3     | 3.6      | 0.1195 | 1.898  | 0.868    |            |
| 24 | 7.325  | 14.8     | 2.2      | 0.1038 | 1.03   | 0.576    |            |
| 25 | 7.882  | 5.1      | 4.50E-01 | 0.1587 | 0.351  | 0.697    |            |
| 26 | 8.265  | 29.3     | 3.2      | 0.1322 | 2.033  | 1.036    |            |
| 27 | 8.852  | 3.1      | 5.10E-01 | 0.0961 | 0.217  | 0.879    |            |
| 28 | 9.151  | 6.40E-01 | 9.70E-02 | 0.1046 | 0.044  | 0.555    |            |
| 29 | 9.674  | 3.6      | 2.90E-01 | 0.1839 | 0.253  | 0.798    |            |
| 30 | 10.013 | 3.7      | 2.60E-01 | 0.1954 | 0.26   | 0.605    |            |
| 31 | 10.642 | 1.8      | 1.70E-01 | 0.1596 | 0.128  | 0.778    |            |
| 32 | 10.914 | 2.7      | 1.70E-01 | 0.2059 | 0.187  | 0.476    |            |
| 33 | 12.558 | 3.40E-01 | 3.60E-02 | 0.121  | 0.024  | 3.227    |            |
| 34 | 12.882 | 6.5      | 5.60E-01 | 0.1746 | 0.452  | 0.884    |            |
| 35 | 13.078 | 6.1      | 4.90E-01 | 0.1918 | 0.425  | 0.486    |            |
| 36 | 13.784 | 5        | 2.90E-01 | 0.2302 | 0.347  | 0.601    |            |
| 37 | 14.644 | 16.9     | 1.4      | 0.1854 | 1.174  | 0.714    |            |
| 38 | 15.575 | 360.4    | 17.1     | 0.342  | 25.015 | 1.101    |            |
| 39 | 17.238 | 3.3      | 1.90E-01 | 0.2383 | 0.229  | 1.988    |            |
| 40 | 17.624 | 83       | 6.1      | 0.2039 | 5.763  | 0.654    |            |
| 41 | 20.623 | 26.4     | 1.6      | 0.2373 | 1.836  | 0.635    |            |
| 42 | 22.185 | 3.2      | 3.00E-01 | 0.1588 | 0.225  | 1.063    |            |
| 43 | 22.497 | 14.5     | 7.20E-01 | 0.2752 | 1.003  | 0.626    |            |

(b) 70COL – Wavelength 376 nm

| #  | Time   | Area     | Height   | Width  | Area%  | Symmetry | Name          |
|----|--------|----------|----------|--------|--------|----------|---------------|
| 1  | 1.041  | 4.00E-01 | 9.60E-02 | 0.0611 | 0.078  | 1.109    |               |
| 2  | 2.059  | 6.7      | 1        | 0.0941 | 1.302  | 1.27     |               |
| 3  | 2.222  | 20.9     | 4.1      | 0.069  | 4.039  | 2.013    |               |
| 4  | 2.3    | 20.3     | 4.4      | 0.0743 | 3.934  | 1.024    |               |
| 5  | 2.479  | 10.8     | 7.40E-01 | 0.188  | 2.093  | 0.237    |               |
| 6  | 2.898  | 11.6     | 3.5      | 0.0506 | 2.238  | 0.831    |               |
| 7  | 3.032  | 44.6     | 8        | 0.0811 | 8.625  | 0.685    |               |
| 8  | 3.373  | 6.2      | 4.10E-01 | 0.2024 | 1.197  | 3.032    |               |
| 9  | 4.192  | 1.3      | 1.80E-01 | 0.1068 | 0.253  | 0.827    |               |
| 10 | 4.531  | 4.20E-01 | 6.90E-02 | 0.0908 | 0.081  | 1.971    |               |
| 11 | 4.893  | 6.4      | 9.10E-01 | 0.1044 | 1.239  | 0.874    |               |
| 12 | 5.008  | 3.1      | 4.90E-01 | 0.0947 | 0.592  | 0.379    |               |
| 13 | 5.207  | 1.8      | 3.30E-01 | 0.0814 | 0.349  | 0.996    |               |
| 14 | 5.468  | 7.1      | 7.60E-01 | 0.1306 | 1.364  | 1.283    |               |
| 15 | 5.893  | 10.7     | 1.6      | 0.1007 | 2.074  | 0.875    |               |
| 16 | 6.094  | 4.8      | 7.50E-01 | 0.0983 | 0.927  | 0.844    |               |
| 17 | 6.371  | 140.1    | 19.3     | 0.1087 | 27.093 | 0.609    |               |
| 18 | 6.752  | 2.2      | 4.10E-01 | 0.0771 | 0.419  | 0.934    |               |
| 19 | 6.874  | 5.5      | 7.60E-01 | 0.1036 | 1.057  | 0.688    |               |
| 20 | 7.201  | 4.10E-01 | 1.10E-01 | 0.0565 | 0.079  | 1.363    |               |
| 21 | 7.324  | 6.8      | 8.80E-01 | 0.1122 | 1.317  | 0.59     |               |
| 22 | 8.268  | 7.9      | 1        | 0.1162 | 1.537  | 0.787    |               |
| 23 | 8.852  | 1.1      | 1.90E-01 | 0.0934 | 0.218  | 0.894    |               |
| 24 | 9.142  | 3.20E-01 | 4.00E-02 | 0.1004 | 0.062  | 0.389    |               |
| 25 | 9.684  | 8.20E-01 | 8.20E-02 | 0.1376 | 0.159  | 1.759    |               |
| 26 | 10.014 | 5.5      | 4.10E-01 | 0.1942 | 1.07   | 0.514    |               |
| 27 | 10.643 | 3.00E-01 | 3.60E-02 | 0.1114 | 0.058  | 2.698    |               |
| 28 | 12.859 | 2.2      | 1.30E-01 | 0.2184 | 0.426  | 0.318    |               |
| 29 | 13.837 | 1.3      | 9.50E-02 | 0.1755 | 0.259  | 0.769    |               |
| 30 | 14.648 | 3.2      | 2.60E-01 | 0.1807 | 0.617  | 0.699    |               |
| 31 | 15.574 | 137.8    | 6.4      | 0.3474 | 26.656 | 1.036    | Amentoflavone |
| 32 | 17.623 | 30.4     | 2.2      | 0.2037 | 5.879  | 0.656    |               |
| 33 | 20.626 | 7.3      | 4.70E-01 | 0.2245 | 1.416  | 0.524    |               |
| 34 | 22.188 | 1.3      | 1.10E-01 | 0.1538 | 0.243  | 1.029    |               |
| 35 | 22.473 | 5.4      | 2.50E-01 | 0.2675 | 1.051  | 0.369    |               |

Table S5. Peak table of HPLC chromatogram of 70COLGA. (a) Quercitrin. (b) Amentoflavone.

(a) 70COLGA– Wavelength 330 nm

| #  | Time   | Area     | Height   | Width  | Area%  | Symmetry | Name          |
|----|--------|----------|----------|--------|--------|----------|---------------|
| 1  | 0.455  | 6.30E-02 | 2.10E-02 | 0.0499 | 0.013  | 1.141    |               |
| 2  | 2.068  | 14.1     | 2        | 0.0999 | 2.922  | 1.714    |               |
| 3  | 2.221  | 29.5     | 3.6      | 0.1236 | 6.1    | 1.154    |               |
| 4  | 2.309  | 9.6      | 3.1      | 0.0521 | 1.986  | 0.496    |               |
| 5  | 2.482  | 10.7     | 6.30E-01 | 0.2143 | 2.211  | 0.214    |               |
| 6  | 2.895  | 20.4     | 6.1      | 0.053  | 4.232  | 0.79     |               |
| 7  | 3.036  | 63.4     | 10.1     | 0.0889 | 13.114 | 0.573    |               |
| 8  | 3.396  | 4.4      | 5.40E-01 | 0.1219 | 0.916  | 0.711    |               |
| 9  | 4.192  | 4.5      | 4.60E-01 | 0.1392 | 0.94   | 1.449    |               |
| 10 | 4.548  | 1.2      | 9.80E-02 | 0.163  | 0.242  | 1.783    |               |
| 11 | 4.886  | 19.3     | 2.2      | 0.126  | 3.997  | 0.596    |               |
| 12 | 5.202  | 7.50E-01 | 1.90E-01 | 0.063  | 0.156  | 0.933    |               |
| 13 | 5.332  | 2.7      | 4.80E-01 | 0.0878 | 0.557  | 1.031    |               |
| 14 | 5.473  | 7.1      | 9.00E-01 | 0.1137 | 1.467  | 0.707    |               |
| 15 | 5.73   | 9.70E-01 | 1.60E-01 | 0.0935 | 0.201  | 0.84     |               |
| 16 | 5.89   | 2.9      | 4.90E-01 | 0.0912 | 0.598  | 1.085    |               |
| 17 | 6.093  | 3.9      | 6.00E-01 | 0.1044 | 0.811  | 0.778    |               |
| 18 | 6.372  | 209.9    | 30.5     | 0.1042 | 43.454 | 0.727    |               |
| 19 | 6.775  | 2.4      | 4.00E-01 | 0.087  | 0.502  | 1.878    |               |
| 20 | 6.874  | 3.2      | 5.50E-01 | 0.0876 | 0.658  | 0.889    |               |
| 21 | 7.2    | 3.20E-01 | 9.60E-02 | 0.0525 | 0.065  | 1.122    |               |
| 22 | 7.325  | 7.4      | 9.40E-01 | 0.1157 | 1.528  | 0.591    |               |
| 23 | 8.272  | 5.8      | 7.40E-01 | 0.1157 | 1.205  | 0.64     |               |
| 24 | 8.847  | 1.1      | 6.80E-02 | 0.2091 | 0.231  | 0.168    |               |
| 25 | 9.64   | 7.90E-01 | 6.50E-02 | 0.149  | 0.164  | 0.741    |               |
| 26 | 10.004 | 1.3      | 1.10E-01 | 0.1539 | 0.276  | 0.387    |               |
| 27 | 12.921 | 1.3      | 8.80E-02 | 0.1818 | 0.261  | 1.552    |               |
| 28 | 13.946 | 5.80E-01 | 5.10E-02 | 0.1425 | 0.119  | 2.801    |               |
| 29 | 14.68  | 2.4      | 1.60E-01 | 0.1813 | 0.495  | 0.575    |               |
| 30 | 15.571 | 42.7     | 2        | 0.3383 | 8.841  | 0.872    | Amentoflavone |
| 31 | 17.655 | 4.3      | 3.00E-01 | 0.1972 | 0.89   | 0.636    |               |
| 32 | 20.648 | 4.1      | 2.50E-01 | 0.2086 | 0.849  | 0.408    |               |

(b) 70COLGA – Wavelength 376 nm

| #  | Time   | Area  | Height   | Width  | Area%  | Symmetry | Name       |
|----|--------|-------|----------|--------|--------|----------|------------|
| 1  | 2.086  | 76.4  | 11.8     | 0.0997 | 4.894  | 1.528    |            |
| 2  | 2.216  | 81.5  | 13.3     | 0.0896 | 5.221  | 1.453    |            |
| 3  | 2.304  | 66.5  | 12.5     | 0.0762 | 4.264  | 0.987    |            |
| 4  | 2.485  | 5.1   | 4.40E-01 | 0.1556 | 0.326  | 9.53E-02 |            |
| 5  | 2.892  | 56.9  | 16.7     | 0.0517 | 3.645  | 0.812    |            |
| 6  | 3.034  | 109.1 | 21.3     | 0.0777 | 6.994  | 0.901    |            |
| 7  | 3.225  | 32.3  | 3.1      | 0.1525 | 2.073  | 0.762    |            |
| 8  | 3.734  | 1.4   | 1.90E-01 | 0.1128 | 0.09   | 0.766    |            |
| 9  | 4.19   | 54.7  | 7.7      | 0.1068 | 3.506  | 0.806    |            |
| 10 | 4.476  | 12.6  | 1.2      | 0.1416 | 0.807  | 0.642    |            |
| 11 | 4.885  | 351   | 44.2     | 0.1167 | 22.49  | 0.68     |            |
| 12 | 5.328  | 1.2   | 3.10E-01 | 0.0642 | 0.074  | 1.046    |            |
| 13 | 5.539  | 32.2  | 4.7      | 0.102  | 2.065  | 1.025    |            |
| 14 | 5.719  | 27.1  | 3.9      | 0.1007 | 1.739  | 0.799    |            |
| 15 | 5.88   | 31.6  | 5.1      | 0.0919 | 2.024  | 1.036    |            |
| 16 | 6.078  | 4.8   | 9.30E-01 | 0.085  | 0.31   | 0.729    |            |
| 17 | 6.372  | 320.2 | 45.9     | 0.1053 | 20.519 | 0.717    | Quercitrin |
| 18 | 6.648  | 15.3  | 1.9      | 0.1153 | 0.978  | 0.657    |            |
| 19 | 7.009  | 75    | 7.3      | 0.1499 | 4.807  | 1.158    |            |
| 20 | 7.326  | 18.9  | 2.4      | 0.114  | 1.21   | 0.613    |            |
| 21 | 8.271  | 17.5  | 2.1      | 0.1215 | 1.12   | 0.754    |            |
| 22 | 8.854  | 1.2   | 1.80E-01 | 0.105  | 0.076  | 0.752    |            |
| 23 | 9.663  | 2.2   | 1.90E-01 | 0.1694 | 0.14   | 0.802    |            |
| 24 | 10.637 | 1     | 1.20E-01 | 0.1376 | 0.065  | 0.882    |            |
| 25 | 12.904 | 5.3   | 3.20E-01 | 0.2218 | 0.342  | 0.642    |            |
| 26 | 13.93  | 2     | 1.40E-01 | 0.1913 | 0.131  | 1.647    |            |
| 27 | 14.671 | 11.1  | 8.00E-01 | 0.203  | 0.709  | 0.7      |            |
| 28 | 15.575 | 116.2 | 5.4      | 0.3434 | 7.448  | 0.893    |            |
| 29 | 17.653 | 12.1  | 8.30E-01 | 0.2142 | 0.772  | 0.618    |            |
| 30 | 20.66  | 13    | 8.40E-01 | 0.2304 | 0.833  | 0.578    |            |
| 31 | 22.478 | 5.1   | 2.10E-01 | 0.3025 | 0.328  | 1.575    |            |
